# Supplementary material for: Motor selection dynamics in FEF explain the reaction time variance of saccades to single targets
Source: eLife journal article supplement (doi:10.7554/elife.33456), 2018-04-13
Supplement: supp [file elife_poa_e33456_Transparent_Reporting_Form.docx]

***eLife’s* transparent reporting form**

We encourage authors to provide detailed information *within their submission* to facilitate the interpretation and replication of experiments. Authors can upload supporting documentation to indicate the use of appropriate reporting guidelines for health-related research (see [EQUATOR Network](http://www.equator-network.org/%20)), life science research (see the [BioSharing Information Resource](https://biosharing.org/)), or the [ARRIVE guidelines](http://www.plosbiology.org/article/info:doi/10.1371/journal.pbio.1000412) for reporting work involving animal research. Where applicable, authors should refer to any relevant reporting standards documents in this form.

If you have any questions, please consult our Journal Policies and/or contact us: [editorial@elifesciences.org](mailto:editorial@elifesciences.org).

**Sample-size estimation**

- You should state whether an appropriate sample size was computed when the study was being designed
- You should state the statistical method of sample size computation and any required assumptions
- If no explicit power analysis was used, you should describe how you decided what sample (replicate) size (number) to use

Please outline where this information can be found within the submission (e.g., sections or figure legends), or explain why this information doesn’t apply to your submission:

Using two monkeys is customary in single-neuron neurophysiology experiments. Neuronal populations on the order of 100 neurons are appropriate when the data are divided into a small number of neuronal categories.

**Replicates**

- You should report how often each experiment was performed
- You should include a definition of biological versus technical replication
- The data obtained should be provided and sufficient information should be provided to indicate the number of independent biological and/or technical replicates
- If you encountered any outliers, you should describe how these were handled
- Criteria for exclusion/inclusion of data should be clearly stated
- High-throughput sequence data should be uploaded before submission, with a private link for reviewers provided (these are available from both GEO and ArrayExpress)

Please outline where this information can be found within the submission (e.g., sections or figure legends), or explain why this information doesn’t apply to your submission:

Numbers animals and neurons/recording sessions are clearly stated in the Results (*Motor conflict during the rise-to-threshold process*). So are the numbers of trials obtained in each condition (Results, *Behavioral manifestations of a spatial bias*). Included neural types and numbers are clearly indicated (e.g., Figs. 3, 4, 7, 10; Fig. 3, supplement 1; Fig. 7 supplements 2, 3). Classification and inclusion criteria for our neuronal sample are detailed in the Methods (*Neuronal classification and selection*). Trial selection criteria are included too (Methods, *Trial selection*).

**Statistical reporting**

- Statistical analysis methods should be described and justified
- Raw data should be presented in figures whenever informative to do so (typically when N per group is less than 10)
- For each experiment, you should identify the statistical tests used, exact values of N, definitions of center, methods of multiple test correction, and dispersion and precision measures (e.g., mean, median, SD, SEM, confidence intervals; and, for the major substantive results, a measure of effect size (e.g., Pearson's r, Cohen's d)
- Report exact p-values wherever possible alongside the summary statistics and 95% confidence intervals. These should be reported for all key questions and not only when the p-value is less than 0.05.

Please outline where this information can be found within the submission (e.g., sections or figure legends), or explain why this information doesn’t apply to your submission:

Exact *p*-values are reported throughout the Results section, along with the corresponding statistical test used. Errorbar definitions (SEM/SD) are included in figure captions wherever applicable. Measures of correlation are defined in the main text of the Results as well as in the corresponding figures (Figs. 4, 8, 9, Fig. 7, supplement 1). Additional methodological details are included in the Methods (*Statistical analyses; RT matching*).

(For large datasets, or papers with a very large number of statistical tests, you may upload a single table file with tests, Ns, etc., with reference to sections in the manuscript.)

**Group allocation**

- Indicate how samples were allocated into experimental groups (in the case of clinical studies, please specify allocation to treatment method); if randomization was used, please also state if restricted randomization was applied
- Indicate if masking was used during group allocation, data collection and/or data analysis

Please outline where this information can be found within the submission (e.g., sections or figure legends), or explain why this information doesn’t apply to your submission:

Our data were not divided into predefined groups.

**Additional data files (“source data”)**

- We encourage you to upload relevant additional data files, such as numerical data that are represented as a graph in a figure, or as a summary table
- Where provided, these should be in the most useful format, and they can be uploaded as “Source data” files linked to a main figure or table
- Include model definition files including the full list of parameters used
- Include code used for data analysis (e.g., R, MatLab)
- Avoid stating that data files are “available upon request”

Please indicate the figures or tables for which source data files have been provided:

Three Matlab scripts for running the model are provided (Source Code Files 1, 2, and 3). They replicate the simulations shown in Figs 5, 7, and 10.
